# Supplementary material
Source: MDPI journal article supplement (https://www.mdpi.com/1424-2818/13/9/422)
Supplement: s1 [file s1 › diversity-1333074-supplementary.pdf]

## Supplementary Material

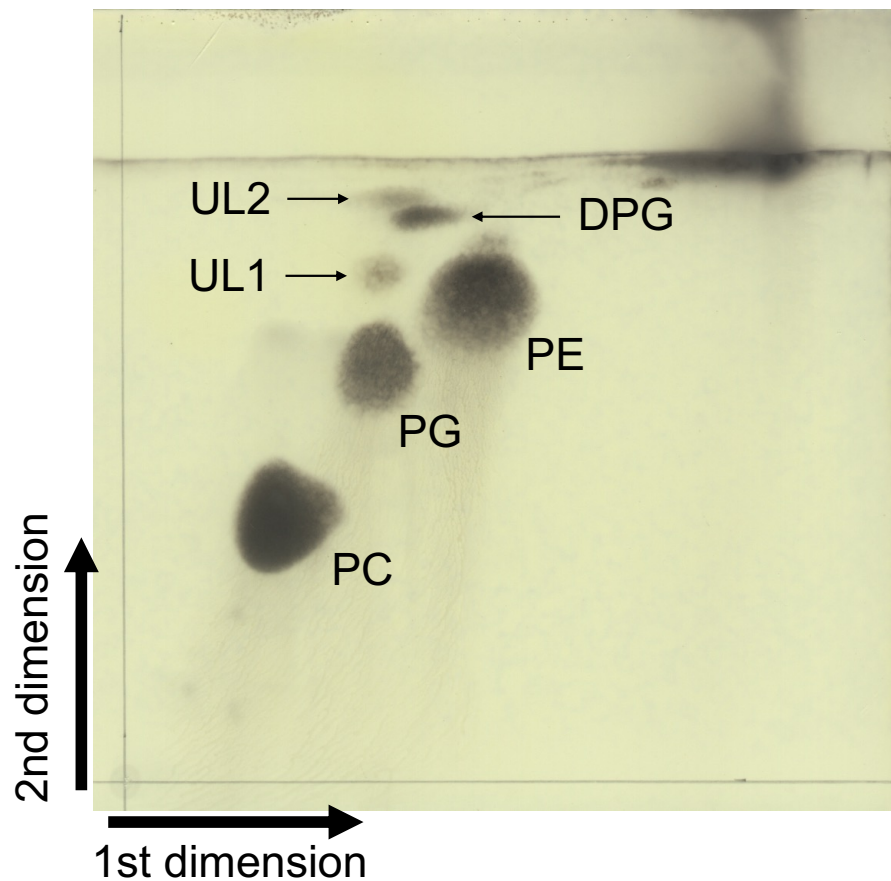

**Figure S1.** Polar lipids of strain IZ6<sup>T</sup> after separation by two-dimensional HPTLC. DPG, diphosphatidylglycerol; PC, phosphatidylcholine; PE, phosphatidylethanolamine; PG, phosphatidylglycerol; UL1 and UL2, unidentified polar lipids.
